# Supplementary material for: Cluster-to-particle transition in atmospheric nanoclusters
Source: Copernicus journal article supplement (doi:10.5194/ar-2-303-2024), 2024-11-27
Supplement: Supplementary file 1 [file ar-2-303-2024-supplement.pdf]

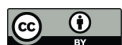

*Supplement of*

## **Cluster-to-particle transition in atmospheric nanoclusters**

**Haide Wu et al.**

*Correspondence to:* Jonas Elm ([jelm@chem.au.dk](mailto:jelm@chem.au.dk))

The copyright of individual parts of the supplement might differ from the article licence.

**Table S1.** Binding free energies  $\Delta G_{\text{bind}}$  and size-averaged binding free energy  $\Delta G_{\text{bind}}/m$  of  $(\text{SA})_n(\text{Base})_n$  clusters (Lowest energy configurations, monomer count  $m = 2n, n = 1 \sim 15$ ).

| Monomer<br>Count $m$ | SA-DMA                   |                            | SA-AM                    |                            | SA-MA                    |                            | SA-TMA                   |                            |
|----------------------|--------------------------|----------------------------|--------------------------|----------------------------|--------------------------|----------------------------|--------------------------|----------------------------|
|                      | $\Delta G_{\text{bind}}$ | $\Delta G_{\text{bind}}/m$ |
| 2                    | -12.209                  | -6.104                     | -8.166                   | -4.083                     | -9.773                   | -4.886                     | -11.216                  | -5.608                     |
| 4                    | -42.431                  | -10.608                    | -30.828                  | -7.707                     | -37.800                  | -9.450                     | -34.788                  | -8.697                     |
| 6                    | -69.758                  | -11.626                    | -54.908                  | -9.151                     | -66.329                  | -11.055                    | -51.874                  | -8.646                     |
| 8                    | -97.628                  | -12.203                    | -82.281                  | -10.285                    | -96.796                  | -12.100                    | -78.304                  | -9.788                     |
| 10                   | -125.943                 | -12.594                    | -109.191                 | -10.919                    | -126.638                 | -12.664                    | -94.996                  | -9.500                     |
| 12                   | -154.808                 | -12.901                    | -137.574                 | -11.465                    | -161.491                 | -13.458                    | -117.489                 | -9.791                     |
| 14                   | -180.523                 | -12.895                    | -167.116                 | -11.937                    | -191.728                 | -13.695                    | -135.217                 | -9.658                     |
| 16                   | -207.598                 | -12.975                    | -196.250                 | -12.266                    | -224.950                 | -14.059                    | -156.430                 | -9.777                     |
| 18                   | -237.180                 | -13.177                    | -228.335                 | -12.685                    | -254.913                 | -14.162                    | -182.792                 | -10.155                    |
| 20                   | -264.325                 | -13.216                    | -256.266                 | -12.813                    | -288.369                 | -14.418                    | -204.435                 | -10.222                    |
| 22                   | -288.533                 | -13.115                    | -281.994                 | -12.818                    | -322.734                 | -14.670                    | -224.055                 | -10.184                    |
| 24                   | -320.280                 | -13.345                    | -313.074                 | -13.045                    | -352.506                 | -14.688                    | -246.493                 | -10.271                    |
| 26                   | -348.137                 | -13.390                    | -337.161                 | -12.968                    | -383.187                 | -14.738                    | -265.303                 | -10.204                    |
| 28                   | -372.227                 | -13.294                    | -368.948                 | -13.177                    | -415.376                 | -14.835                    | -284.866                 | -10.174                    |
| 30                   | -402.285                 | -13.409                    | -394.024                 | -13.134                    | -447.527                 | -14.918                    | -303.211                 | -10.107                    |

**Table S2.** Binding free energies  $\Delta G_{\text{bind}}$  of  $(\text{SA})_n(\text{Base})_n$  clusters (thermal averaged by configurations, monomer count  $m = 2n, n = 1 \sim 15$ ).

| Monomer<br>Count $m$ | SA-DMA   | SA-AM    | SA-MA    | SA-TMA   |
|----------------------|----------|----------|----------|----------|
| 2                    | -12.209  | -8.166   | -9.773   | -11.216  |
| 4                    | -42.650  | -30.992  | -37.976  | -34.788  |
| 6                    | -70.372  | -55.312  | -66.565  | -52.311  |
| 8                    | -97.787  | -82.874  | -97.101  | -78.362  |
| 10                   | -126.510 | -109.538 | -127.144 | -95.330  |
| 12                   | -155.499 | -137.958 | -161.886 | -118.001 |
| 14                   | -181.120 | -167.771 | -192.437 | -135.259 |
| 16                   | -207.614 | -196.791 | -224.986 | -156.635 |
| 18                   | -237.561 | -228.720 | -255.359 | -183.054 |
| 20                   | -264.561 | -256.340 | -288.672 | -204.491 |
| 22                   | -288.788 | -282.219 | -323.091 | -224.484 |
| 24                   | -320.294 | -313.223 | -352.618 | -247.057 |
| 26                   | -348.541 | -337.389 | -383.600 | -265.490 |
| 28                   | -372.436 | -368.999 | -415.691 | -284.993 |
| 30                   | -402.738 | -394.181 | -447.846 | -303.439 |

**Table S3.** Binding free energies  $\Delta G_{\text{bind}}$  of  $(\text{SA})_n(\text{Base})_n$  clusters (four lowest energy configurations, monomer count  $m = 2n$ ,  $n = 1 \sim 8$ ).

| Monomer<br>Count $m$ | SA-DMA   | SA-AM    | SA-MA    | SA-TMA   |
|----------------------|----------|----------|----------|----------|
| 2                    | -12.209  | -8.166   | -9.773   | -11.216  |
| 2                    |          |          |          |          |
| 2                    |          |          |          |          |
| 2                    |          |          |          |          |
| 4                    | -37.696  | -29.700  | -37.172  | -29.776  |
| 4                    | -40.737  | -29.784  | -37.800  | -34.788  |
| 4                    | -41.874  | -30.828  |          |          |
| 4                    | -42.431  |          |          |          |
| 6                    | -68.917  | -52.860  | -63.549  | -50.590  |
| 6                    | -68.923  | -53.663  | -65.015  | -50.724  |
| 6                    | -69.694  | -54.780  | -65.725  | -51.203  |
| 6                    | -69.758  | -54.908  | -66.329  | -51.874  |
| 8                    | -95.469  | -81.083  | -95.402  | -74.874  |
| 8                    | -95.880  | -81.988  | -95.976  | -75.440  |
| 8                    | -96.247  | -82.212  | -96.067  | -76.882  |
| 8                    | -97.628  | -82.281  | -96.796  | -78.304  |
| 10                   | -124.873 | -107.517 | -125.622 | -93.553  |
| 10                   | -124.991 | -108.299 | -125.831 | -93.890  |
| 10                   | -125.056 | -108.787 | -126.000 | -94.139  |
| 10                   | -125.943 | -109.191 | -126.638 | -94.996  |
| 12                   | -153.877 | -136.098 | -160.474 | -116.340 |
| 12                   | -153.946 | -136.416 | -160.784 | -116.523 |
| 12                   | -154.300 | -137.197 | -160.829 | -117.338 |
| 12                   | -154.808 | -137.574 | -161.491 | -117.489 |
| 14                   | -179.810 | -166.355 | -191.220 | -131.630 |
| 14                   | -180.074 | -166.533 | -191.298 | -132.640 |
| 14                   | -180.161 | -166.928 | -191.500 | -133.453 |
| 14                   | -180.523 | -167.116 | -191.728 | -135.217 |
| 16                   | -204.181 | -195.274 | -222.043 | -154.504 |
| 16                   | -204.334 | -195.456 | -222.145 | -155.144 |
| 16                   | -204.691 | -196.007 | -222.995 | -155.254 |
| 16                   | -207.598 | -196.250 | -224.950 | -156.430 |

**Table S4.** Binding free energies  $\Delta G_{\text{bind}}$  of  $(\text{SA})_n(\text{Base})_n$  clusters (four lowest energy configurations, monomer count  $m = 2n$ ,  $n = 9 \sim 15$ ).

| Monomer<br>Count $m$ | SA-DMA   | SA-AM    | SA-MA    | SA-TMA   |
|----------------------|----------|----------|----------|----------|
| 18                   | -235.665 | -227.000 | -253.660 | -180.888 |
| 18                   | -236.082 | -227.468 | -253.951 | -181.213 |
| 18                   | -236.625 | -227.741 | -254.101 | -182.228 |
| 18                   | -237.180 | -228.335 | -254.913 | -182.792 |
| 20                   | -262.824 | -253.764 | -286.936 | -201.569 |
| 20                   | -262.926 | -254.473 | -287.440 | -202.415 |
| 20                   | -263.228 | -254.544 | -287.674 | -202.695 |
| 20                   | -264.325 | -256.266 | -288.369 | -204.435 |
| 22                   | -287.161 | -279.301 | -320.817 | -221.999 |
| 22                   | -287.280 | -279.467 | -320.886 | -223.379 |
| 22                   | -287.482 | -281.469 | -322.549 | -223.821 |
| 22                   | -288.533 | -281.994 | -322.734 | -224.055 |
| 24                   | -316.966 | -311.012 | -350.430 | -245.640 |
| 24                   | -317.138 | -311.794 | -350.442 | -245.666 |
| 24                   | -317.435 | -311.803 | -350.864 | -246.146 |
| 24                   | -320.280 | -313.074 | -352.506 | -246.493 |
| 26                   | -346.227 | -335.598 | -381.153 | -260.385 |
| 26                   | -346.460 | -335.851 | -381.289 | -262.671 |
| 26                   | -348.056 | -336.184 | -383.136 | -264.695 |
| 26                   | -348.137 | -337.161 | -383.187 | -265.303 |
| 28                   | -370.165 | -362.961 | -412.315 | -281.602 |
| 28                   | -370.928 | -365.580 | -414.138 | -283.107 |
| 28                   | -371.393 | -367.498 | -415.040 | -283.863 |
| 28                   | -372.227 | -368.948 | -415.376 | -284.866 |
| 30                   | -400.950 | -391.275 | -445.279 | -301.338 |
| 30                   | -401.865 | -391.705 | -446.564 | -301.598 |
| 30                   | -401.876 | -393.251 | -447.074 | -302.495 |
| 30                   | -402.285 | -394.024 | -447.527 | -303.211 |
